# Supplementary material for: Nucleotides upstream of the Kozak sequence strongly influence gene expression in the yeast S. cerevisiae
Source: PubMed Central journal article supplement (PMC5563945; doi:10.1186/s13036-017-0068-1), 2017-08-21
Supplement: 13036_2017_68_MOESM1_ESM.pdf [file 13036_2017_68_MOESM1_ESM.pdf]

Nucleotides upstream of the Kozak sequence exert high  
influence on gene expression in yeast *S. cerevisiae*  
**Supplementary Material**

Jing Li<sup>1</sup>, Qiang Liang<sup>1</sup>, Wenjiang Song<sup>1</sup>, and Mario Andrea Marchisio<sup>1,\*</sup>

<sup>1</sup>School of Life Science and Technology, Harbin Institute of Technology,  
2 Yikuang Street, Nan Gang District, 150080 Harbin, P. R. China

\*corresponding author

email addresses: JL, 920138462@qq.com; QL, 804257847@qq.com; WS, 1176784021@qq.com  
MAM: marchisio@hit.edu.cn, mamarchisio@yahoo.com

## Plasmids used in this work

| Plasmid name | Construct                         |
|--------------|-----------------------------------|
| pMM61        | pRSII406-pCYC1min-yEGFP-CYC1t     |
| pMM75        | pRSII406-pCYC1min-k1-yEGFP-CYC1t  |
| pMM76        | pRSII406-pCYC1min-k2-yEGFP-CYC1t  |
| pMM121       | pRSII406-pCYC1min-k3-yEGFP-CYC1t  |
| pMM113       | pRSII406-pCYC1min-k4-yEGFP-CYC1t  |
| pMM77        | pRSII406-pCYC1min-k5-yEGFP-CYC1t  |
| pMM78        | pRSII406-pCYC1min-k6-yEGFP-CYC1t  |
| pMM79        | pRSII406-pCYC1min-k7-yEGFP-CYC1t  |
| pMM83        | pRSII406-pCYC1min-k8-yEGFP-CYC1t  |
| pMM84        | pRSII406-pCYC1min-k9-yEGFP-CYC1t  |
| pMM85        | pRSII406-pCYC1min-k10-yEGFP-CYC1t |
| pMM86        | pRSII406-pCYC1min-k11-yEGFP-CYC1t |
| pMM93        | pRSII406-pCYC1min-k12-yEGFP-CYC1t |
| pMM130       | pRSII406-pCYC1min-k13-yEGFP-CYC1t |
| pMM97        | pRSII406-pCYC1min-k14-yEGFP-CYC1t |
| pMM98        | pRSII406-pCYC1min-k15-yEGFP-CYC1t |
| pMM99        | pRSII406-pCYC1min-k16-yEGFP-CYC1t |
| pMM100       | pRSII406-pCYC1min-k17-yEGFP-CYC1t |
| pMM116       | pRSII406-pCYC1min-k18-yEGFP-CYC1t |
| pMM101       | pRSII406-pCYC1min-k19-yEGFP-CYC1t |
| pMM104       | pRSII406-pCYC1min-k20-yEGFP-CYC1t |
| pMM105       | pRSII406-pCYC1min-k21-yEGFP-CYC1t |
| pMM106       | pRSII406-pCYC1min-k22-yEGFP-CYC1t |
| pMM107       | pRSII406-pCYC1min-k23-yEGFP-CYC1t |
| pMM108       | pRSII406-pCYC1min-k24-yEGFP-CYC1t |
| pMM118       | pRSII406-pCYC1min-k25-yEGFP-CYC1t |
| pMM143       | pRSII406-pCYC1min-k26-yEGFP-CYC1t |
| pMM141       | pRSII406-pCYC1min-k27-yEGFP-CYC1t |
| pMM150       | pRSII406-pCYC1min-k28-yEGFP-CYC1t |
| pMM151       | pRSII406-pCYC1min-k29-yEGFP-CYC1t |
| pMM153       | pRSII406-pCYC1min-k30-yEGFP-CYC1t |
| pMM154       | pRSII406-pCYC1min-k31-yEGFP-CYC1t |
| pMM166       | pRSII406-pCYC1min-k32-yEGFP-CYC1t |
| pMM167       | pRSII406-pCYC1min-k33-yEGFP-CYC1t |
| pMM175       | pRSII406-pCYC1min-k34-yEGFP-CYC1t |
| pMM159       | pRSII406-pCYC1min-k35-yEGFP-CYC1t |
| pMM168       | pRSII406-pCYC1min-k36-yEGFP-CYC1t |
| pMM158       | pRSII406-pCYC1min-k37-yEGFP-CYC1t |
| pMM176       | pRSII406-pCYC1min-k38-yEGFP-CYC1t |

Table S1: List of the plasmids assembled with the Gibson method.

| Plasmid name | Construct                                                                          |
|--------------|------------------------------------------------------------------------------------|
| pMM247       | pRSII406-pCYC1min.without.k0-(TACA) <b>BsaI</b> - <b>BsaI</b> (ATGT)-yEGFPgg-CYC1t |
| pMM272       | pMM247-pCYC1min-k39-yEGFPgg-CYC1t                                                  |
| pMM273       | pMM247-pCYC1min-k40-yEGFPgg-CYC1t                                                  |
| pMM274       | pMM247-pCYC1min-k41-yEGFPgg-CYC1t                                                  |
| pMM275       | pMM247-pCYC1min-k42-yEGFPgg-CYC1t                                                  |
| pMM276       | pMM247-pCYC1min-k43-yEGFPgg-CYC1t                                                  |
| pMM277       | pMM247-pCYC1min-k44-yEGFPgg-CYC1t                                                  |
| pMM303       | pMM247-pCYC1min-k45-yEGFPgg-CYC1t                                                  |
| pMM304       | pMM247-pCYC1min-k46-yEGFPgg-CYC1t                                                  |
| pMM305       | pMM247-pCYC1min-k47-yEGFPgg-CYC1t                                                  |
| pMM306       | pMM247-pCYC1min-k48-yEGFPgg-CYC1t                                                  |
| pMM307       | pMM247-pCYC1min-k49-yEGFPgg-CYC1t                                                  |
| pMM309       | pMM247-pCYC1min-k50-yEGFPgg-CYC1t                                                  |
| pMM310       | pMM247-pCYC1min-k51-yEGFPgg-CYC1t                                                  |
| pMM311       | pMM247-pCYC1min-k52-yEGFPgg-CYC1t                                                  |
| pMM312       | pMM247-pCYC1min-k53-yEGFPgg-CYC1t                                                  |
| pMM321       | pMM247-pCYC1min-k54-yEGFPgg-CYC1t                                                  |
| pMM322       | pMM247-pCYC1min-k55-yEGFPgg-CYC1t                                                  |
| pMM323       | pMM247-pCYC1min-k56-yEGFPgg-CYC1t                                                  |
| pMM324       | pMM247-pCYC1min-k57-yEGFPgg-CYC1t                                                  |
| pMM325       | pMM247-pCYC1min-k58-yEGFPgg-CYC1t                                                  |

Table S2: List of the plasmids constructed with the Golden Gate method. The acceptor vector pMM247 was assembled with the Gibson method but, for clarity, it is reported here.

## Yeast strains used in this work

| Strain name | Genotype           | 5'-UTR ID |
|-------------|--------------------|-----------|
| byMM2       | FY1679-08A         | -         |
| byMM15      | byMM2 pMM61::URA3  | k0        |
| byMM26      | byMM2 pMM75::URA3  | k1        |
| byMM27      | byMM2 pMM76::URA3  | k2        |
| byMM56      | byMM2 pMM121::URA3 | k3        |
| byMM52      | byMM2 pMM113::URA3 | k4        |
| byMM28      | byMM2 pMM77::URA3  | k5        |
| byMM29      | byMM2 pMM78::URA3  | k6        |
| byMM30      | byMM2 pMM79::URA3  | k7        |
| byMM31      | byMM2 pMM83::URA3  | k8        |
| byMM32      | byMM2 pMM84::URA3  | k9        |
| byMM39      | byMM2 pMM85::URA3  | k10       |
| byMM36      | byMM2 pMM86::URA3  | k11       |
| byMM115     | byMM2 pMM93::URA3  | k12       |
| byMM59      | byMM2 pMM130::URA3 | k13       |
| byMM41      | byMM2 pMM97::URA3  | k14       |
| byMM42      | byMM2 pMM98::URA3  | k15       |
| byMM43      | byMM2 pMM99::URA3  | k16       |
| byMM180     | byMM2 pMM100::URA3 | k17       |
| byMM53      | byMM2 pMM116::URA3 | k18       |
| byMM46      | byMM2 pMM101::URA3 | k19       |
| byMM47      | byMM2 pMM104::URA3 | k20       |
| byMM48      | byMM2 pMM105::URA3 | k21       |
| byMM49      | byMM2 pMM106::URA3 | k22       |
| byMM181     | byMM2 pMM107::URA3 | k23       |
| byMM51      | byMM2 pMM108::URA3 | k24       |
| byMM55      | byMM2 pMM118::URA3 | k25       |

Table S3: List of yeast strains containing 5'-UTRs from  $k_0$  to  $k_{25}$  (plus the original one, byMM2). Plasmids are described in Tables S1.

| Strain name | Genotype           | 5'-UTR ID |
|-------------|--------------------|-----------|
| byMM64      | byMM2 pMM143::URA3 | k26       |
| byMM182     | byMM2 pMM141::URA3 | k27       |
| byMM69      | byMM2 pMM150::URA3 | k28       |
| byMM70      | byMM2 pMM151::URA3 | k29       |
| byMM71      | byMM2 pMM153::URA3 | k30       |
| byMM72      | byMM2 pMM154::URA3 | k31       |
| byMM114     | byMM2 pMM166::URA3 | k32       |
| byMM94      | byMM2 pMM167::URA3 | k33       |
| byMM79      | byMM2 pMM175::URA3 | k34       |
| byMM74      | byMM2 pMM159::URA3 | k35       |
| byMM85      | byMM2 pMM168::URA3 | k36       |
| byMM76      | byMM2 pMM158::URA3 | k37       |
| byMM80      | byMM2 pMM176::URA3 | k38       |

Table S4: List of yeast strains containing 5'-UTRs from  $k_{26}$  to  $k_{38}$ . Plasmids are described in Tables S1.

| Strain name | Genotype           | 5'-UTR ID |
|-------------|--------------------|-----------|
| byMM166     | byMM2 pMM272::URA3 | k39       |
| byMM152     | byMM2 pMM273::URA3 | k40       |
| byMM153     | byMM2 pMM274::URA3 | k41       |
| byMM154     | byMM2 pMM275::URA3 | k42       |
| byMM155     | byMM2 pMM276::URA3 | k43       |
| byMM156     | byMM2 pMM277::URA3 | k44       |
| byMM157     | byMM2 pMM303::URA3 | k45       |
| byMM158     | byMM2 pMM304::URA3 | k46       |
| byMM159     | byMM2 pMM305::URA3 | k47       |
| byMM160     | byMM2 pMM306::URA3 | k48       |
| byMM167     | byMM2 pMM307::URA3 | k49       |
| byMM168     | byMM2 pMM309::URA3 | k50       |
| byMM169     | byMM2 pMM310::URA3 | k51       |
| byMM170     | byMM2 pMM311::URA3 | k52       |
| byMM171     | byMM2 pMM312::URA3 | k53       |
| byMM172     | byMM2 pMM321::URA3 | k54       |
| byMM173     | byMM2 pMM322::URA3 | k55       |
| byMM174     | byMM2 pMM323::URA3 | k56       |
| byMM175     | byMM2 pMM324::URA3 | k57       |
| byMM176     | byMM2 pMM325::URA3 | k58       |

Table S5: List of yeast strains containing 5'-UTRs from  $k_{39}$  to  $k_{58}$ . Plasmids are described in Tables S2.

## MFE values

| ID              | MFE (kcal/mol)  |
|-----------------|-----------------|
| $k_0-k_3$       | - <b>241.21</b> |
| $k_4$           | -241.42         |
| $k_5-k_{25}$    | - <b>241.21</b> |
| $k_{26}$        | -261.39         |
| $k_{27}$        | -247.04         |
| $k_{28}$        | -246.41         |
| $k_{29}$        | -245.97         |
| $k_{30}$        | -244.28         |
| $k_{31}$        | -247.46         |
| $k_{32}$        | - <b>241.21</b> |
| $k_{33}$        | -241.93         |
| $k_{34}$        | -246.59         |
| $k_{35}$        | -242.5          |
| $k_{36}-k_{58}$ | - <b>241.21</b> |

Table S6: Minimum free energies associated with the mRNA structures of the 59 sequences analyzed in this work.

## DNA part sequences

### pCYC1min sequence

GCATGCATGTGCTCTGTATGTATATAAACTCTTGTTTTCTTCTTTTTCTCTAAATATTCCTTT  
 CCTTATACATTAGGACCTTTGCAGCATAAATTACTATACTTCTATAGACACACAAACACAA  
 ATACACACACTAAATTAATA

### yEGFP sequence

ATGTCTAAAGGTGAAGAATTATTCCTGCTGTTGTCCCAATTTTGGTTGAATTAGA  
 TGGTGATGTTAATGGTCACAAATTTTCTGTCTCCGGTGAAGGTGAAGGTGATGCT  
 ACTTACGGTAAATTGACCTTAAAATTTATTTGTACTACTGGTAAATTGCCAGTTCCA  
 TGGCCAACCTTAGTCACTACTTTTCGGTTATGGTGTTCATGTTTTGCGAGATACCC  
 AGATCATATGAAACAACATGACTTTTTCAAGTCTGCCATGCCAGAAGGTTATGTTCA  
 AGAAAGAACTATTTTTTTCAAAGATGACGGTAACTACAAGACCAGAGCTGAAGTCA  
 AGTTTGAAGGTGATACCTTAGTTAATAGAATCGAATTTAAAAGGTATTGATTTTAAAGA  
 AGATGGTAACATTTTAGGTCACAAATTTGGAATACAACACTATAACTCTCACAAATGTTTAC  
 ATCATGGCTGACAAACAAAAGAATGGTATCAAAGTTAACTTCAAATTTAGACACAACA  
 TTGAAGATGGTTCTGTTCAATTAGCTGACCATTATCAACAAAATACTCCAATTGGTGA  
 TGGTCCAGTCTTGTTACCAGACAACCATTACTTATCCACTCAATCTGCCTTATCCAAA  
 GATCCAAACGAAAAGAGAGACCACATGGTCTTGTTAGAATTTGTTACTGCTGCTGGT  
 ATTACCCATGGTATGGATGAATTGTACAAATAA

### yEGFPgg sequence

ATGTCTAAAGGTGAAGAATTATTCCTGCTGTTGTCCCAATTTTGGTTGAATTAGATG  
 GTGATGTTAATGGTCACAAATTTTCTGTCTCCGGTGAAGGTGAAGGTGATGCTACTTA  
 CGGTAAATTGACCTTAAAATTTATTTGTACTACTGGTAAATTGCCAGTTCCATGGCCAA  
 CCTTAGTCACTACTTTTCGGTTATGGTGTTCATGTTTTGCGAGATACCCAGATCATAT  
 GAAACAACATGACTTTTTCAAGTCTGCCATGCCAGAAGGTTATGTTCAAGAAAGAAC  
 TATTTTTTTCAAAGATGACGGTAACTACAAGACCAGAGCTGAAGTCAAGTTTGAAGG

TGATACCTTAGTTAATAGAATCGAATTTAAAAGGTATTGATTTTAAAGAAGATGGTAACA  
TTTTAGGTCACAAATTGGAATACAACCTATAACTCTCACAATGTTTACATCATGGCTGAC  
AAACAAAAGAATGGTATCAAAGTTAACTTCAAAATTAGACACAACATTGAAGATGGTTC  
TGTTCAATTAGCTGACCATTATCAACAAAATACTCCAATTGGTGATGGTCCAGTCTTGT  
TACCAGACAACCATTACTTATCCACTCAATCTGCCTTATCCAAAGATCCAAACGAAAAG  
AGGGACCACATGGTCTTGTTAGAATTTGTTACTGCTGCTGGTATTACCCATGGTATGGA  
TGAATTGTACAAATAA

**CYC1t sequence**

CATGTAATTAGTTATGTCACGCTTACATTCACGCCCTCCCCCACATCCGCTCTA  
ACCGAAAAGGAAGGAGTTAGACAACCTGAAGTCTAGGTCCTATTTATTTTTTTA  
TAGTTATGTTAGTATTAAGAACGTTATTTATATTTCAAATTTTCTTTTTTTCTGTA  
CAGACGCGTGTACGCATGTAACATTATACTGAAAACCTTGCTTGAGAAGGTTTTG  
GGACGCTCGAAGGCTTTAATTTGCAAGCT

## Figures

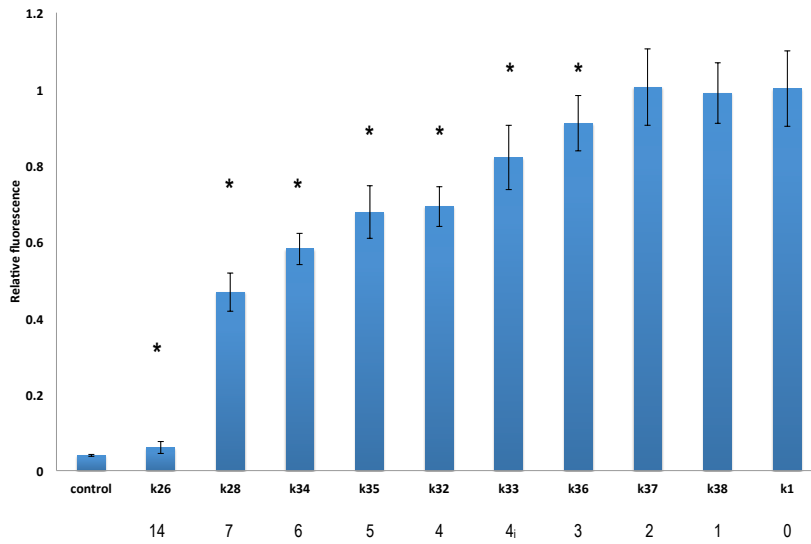

Figure S1: Multiple point mutations to guanine. The ratio between the fluorescence level of ten synthetic 5'-UTRs and the one of  $k_1$  is plotted. Below the leader sequence name the number of guanines present along the 15-nucleotide-long end of our synthetic 5'-UTRs is given.  $k_{26}$  contains a cytosine at position  $-7$ . As for the other leader sequences, all the guanines are inside the upstream region.  $4_i$  refers to the *intermixed* configuration of guanines and adenines inside  $k_{33}$ . Fluorescence increases almost linearly by reducing the number of guanines. Asterisks indicate statistically significant difference with respect to  $k_1$ .



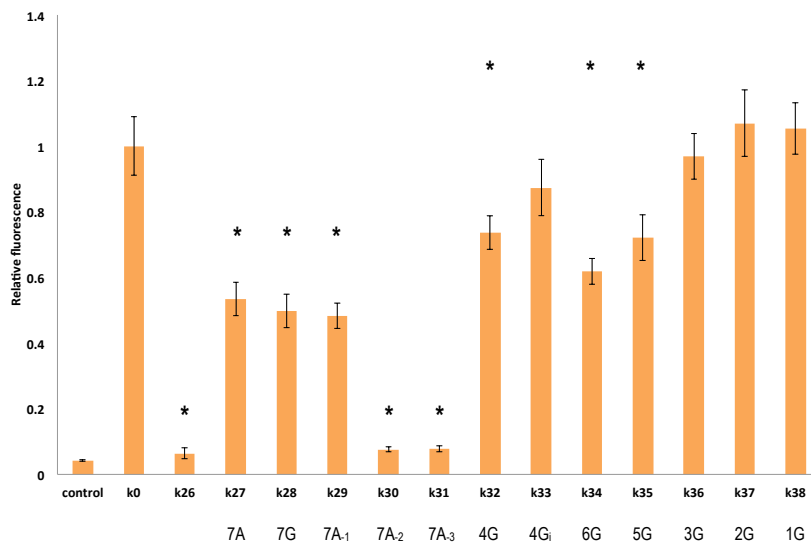

Figure S2: Multiple point mutations to guanine. The ratio between the fluorescence level of the synthetic 5'-UTRs from  $k_{26}$  to  $k_{38}$  and the one of  $k_0$  is plotted. Below the leader sequence name (from  $k_{27}$  to  $k_{38}$ ) the number of adenines or guanines present in the upstream region is given. The subscripts  $-1$ ,  $-2$ , and  $-3$  indicate that an adenine is present in the extended Kozak sequence only at the corresponding position. The subscript  $i$  refers to the *intermixed* configuration of guanines and adenines inside  $k_{33}$ . Asterisks point out statistically significant difference with respect to  $k_0$ .  $k_{33}$  and  $k_{36}$  show statistically significant difference with respect to  $k_1$  (see the main text) but not to  $k_0$ . This is due to the fact that the fluorescence level of  $k_0$  is only, approximately, 94% of the one of  $k_1$ .

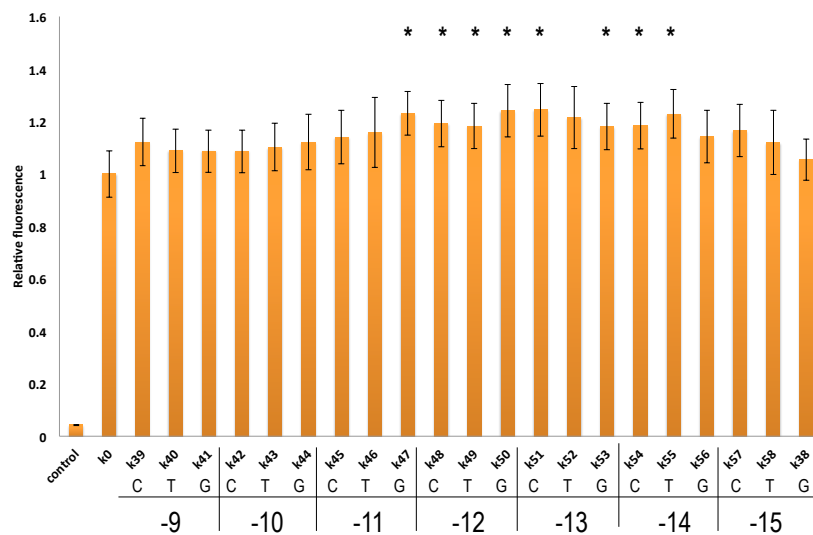

Figure S3: Effect of point mutations, along the upstream region, on fluorescence expression. Fluorescence levels relative to the one of  $k_0$  are presented. Below the name of each synthetic leader sequence the nucleotide that replaced an adenine in  $k_1$  and the position at which the mutation took place are given. Asterisks denote statistically significant difference with respect to  $k_0$ .

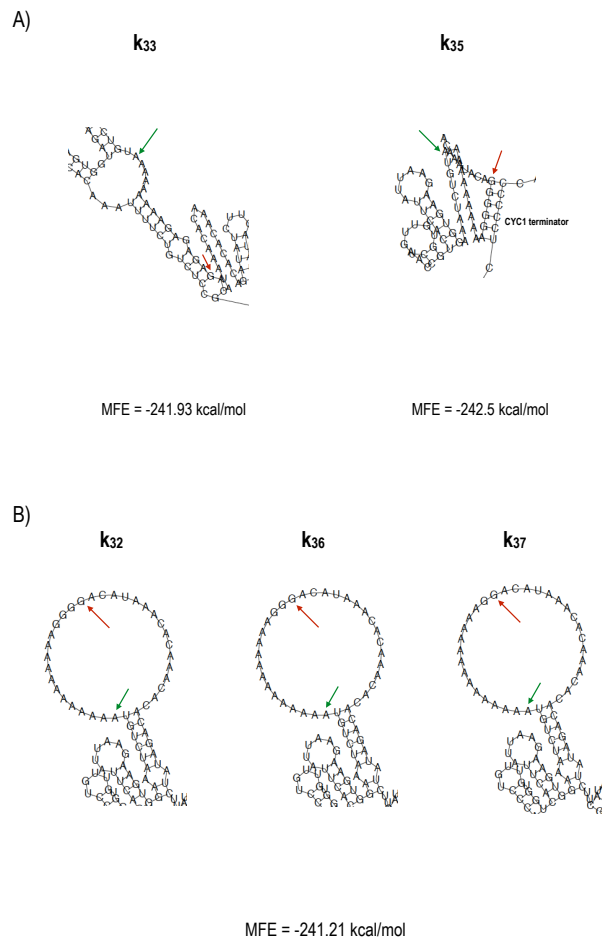

Figure S4: mRNA secondary structures. A) The *intermixed* configuration of  $k_{33}$ , where four guanines alternate with adenines in the upstream region, give rise to a stem that involves 10 nucleotides between position  $-15$  and  $-5$ . However, this mRNA secondary structure has a higher MFE with respect to  $k_{35}$ , where only 6 nucleotides of the upstream region are involved into a stem.  $k_{33}$  let also register a fluorescence level higher than the one of  $k_{35}$ . B) Despite the presence of multiple guanines along the upstream region, the mRNA secondary structures of  $k_{32}$ ,  $k_{36}$ , and  $k_{37}$  show the giant hairpin, as they are computed by RNAfold.
